# Supplementary material
Source: PubMed Central journal article supplement (PMC6788580)
Supplement: wxy083_suppl_supplementary_materials.pdf [file wxy083_suppl_supplementary_materials.pdf]

## Online Supplementary Material

---

### Development of quantitative estimates of wood dust exposure in a Canadian general population job-exposure matrix based on past expert assessments

Jean-François Sauvé <sup>1,2</sup>, Hugh W. Davies <sup>3</sup>, Marie-Élise Parent <sup>2,4,5</sup>, Cheryl E. Peters <sup>6,7,8</sup>, Marie-Pierre Sylvestre <sup>2,5</sup>, Jérôme Lavoué <sup>1,2</sup>

1. Université de Montréal, School of Public Health, Department of environmental and occupational health, Montréal, Québec, Canada
2. Centre de recherche du CHUM, Montréal, Québec, Canada
3. University of British Columbia, School of Population and Public Health, Vancouver, British Columbia, Canada
4. INRS-Institut Armand-Frappier, Université du Québec, Laval, Québec, Canada
5. Université de Montréal, School of Public Health, Department of Social and Preventive Medicine, Montréal, Québec, Canada
6. CAREX Canada, Vancouver, British Columbia, Canada
7. Cancer Epidemiology and Prevention Research, Alberta Health Services, Calgary, Alberta, Canada
8. Preventive Oncology & Community Health Sciences, Cumming School of Medicine, University of Calgary, Calgary, Alberta, Canada

|                                                                                                                                                                                                                                            |      |
|--------------------------------------------------------------------------------------------------------------------------------------------------------------------------------------------------------------------------------------------|------|
| <b>Figure S1.</b> Selection of samples from CWED and reasons from exclusion from the analyses                                                                                                                                              | p.2  |
| <b>Table S1.</b> Number of samples and geometric mean and geometric standard deviation of wood dust exposure levels by occupation (n=31), and the corresponding probability and intensity of exposure in CANJEM cells for period 1930-2005 | p.3  |
| <b>Table S2.</b> Fixed and random-effects model parameters and variance components                                                                                                                                                         | p.5  |
| <b>Table S3.</b> Predicted geometric mean wood dust concentrations for 1989 for all occupations with at least one exposed job in CANJEM for period 1930-2005 (n=198)                                                                       | p.7  |
| <b>Supplementary File S1.</b> JAGS program used to fit the main model                                                                                                                                                                      | p.17 |

**Figure S1. Selection of samples from CWED and reasons from exclusion from the analyses**

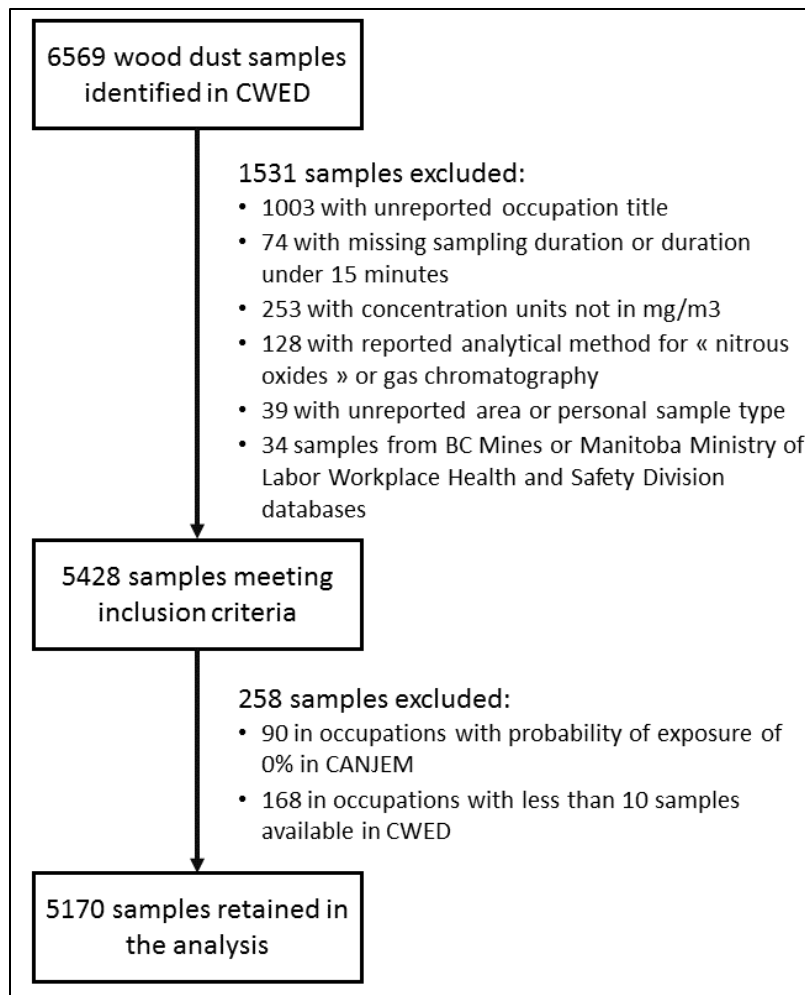

**Table S1. Number of samples and geometric mean and geometric standard deviation of wood dust exposure levels by occupation (n=31), and the corresponding probability and intensity of exposure in CANJEM cells for period 1930-2005**

| NOC 2011 occupation code and title                                                     | Wood dust measurement data |                        |                                         |                  | CANJEM cell estimates, period 1930-2005 |                               |                       |                                                  |            |             |
|----------------------------------------------------------------------------------------|----------------------------|------------------------|-----------------------------------------|------------------|-----------------------------------------|-------------------------------|-----------------------|--------------------------------------------------|------------|-------------|
|                                                                                        | N <sup>a</sup>             | ND <sup>b</sup><br>(n) | GM <sup>c</sup><br>(mg/m <sup>3</sup> ) | GSD <sup>d</sup> | N <sup>e</sup>                          | N <sub>exp</sub> <sup>f</sup> | P <sup>g</sup><br>(%) | Relative percentage of<br>exposed jobs by rating |            |             |
|                                                                                        |                            |                        |                                         |                  |                                         |                               |                       | Low<br>(%)                                       | Med<br>(%) | High<br>(%) |
| 1241: Administrative assistants                                                        | 13                         | 0                      | 3.53                                    | 6.9              | 663                                     | 2                             | 0.3                   | 100.0                                            | 0.0        | 0.0         |
| 2252: Industrial designers                                                             | 23                         | 3                      | 0.75                                    | 3.0              | 21                                      | 4                             | 19.0                  | 75.0                                             | 25.0       | 0.0         |
| 4021: College and other vocational instructors                                         | 88                         | 5                      | 1.30                                    | 3.7              | 142                                     | 9                             | 6.3                   | 11.1                                             | 66.7       | 22.2        |
| 4031: Secondary school teachers                                                        | 163                        | 4                      | 2.18                                    | 3.4              | 257                                     | 6                             | 2.3                   | 83.3                                             | 16.7       | 0.0         |
| 6733: Janitors, caretakers and building superintendents                                | 115                        | 5                      | 1.67                                    | 4.3              | 347                                     | 55                            | 15.9                  | 34.5                                             | 58.2       | 7.3         |
| 7231: Machinists and machining and tooling inspectors                                  | 17                         | 0                      | 0.66                                    | 5.2              | 195                                     | 2                             | 1.0                   | 0.0                                              | 100.0      | 0.0         |
| 7232: Tool and die makers                                                              | 13                         | 0                      | 2.46                                    | 3.5              | 64                                      | 5                             | 7.8                   | 40.0                                             | 20.0       | 40.0        |
| 7242: Industrial electricians                                                          | 11                         | 0                      | 0.42                                    | 2.9              | 76                                      | 8                             | 10.5                  | 62.5                                             | 37.5       | 0.0         |
| 7271: Carpenters                                                                       | 100                        | 2                      | 2.60                                    | 3.4              | 343                                     | 320                           | 93.3                  | 15.0                                             | 78.8       | 6.3         |
| 7272: Cabinetmakers                                                                    | 279                        | 3                      | 2.91                                    | 3.9              | 105                                     | 102                           | 97.1                  | 3.9                                              | 36.3       | 59.8        |
| 7311: Construction millwrights and industrial mechanics                                | 36                         | 1                      | 0.55                                    | 2.5              | 169                                     | 10                            | 5.9                   | 40.0                                             | 60.0       | 0.0         |
| 7321: Automotive service technicians, truck and bus mechanics and mechanical repairers | 14                         | 1                      | 4.62                                    | 3.9              | 295                                     | 2                             | 0.7                   | 100.0                                            | 0.0        | 0.0         |
| 7384: Other trades and related occupations, n.e.c.                                     | 10                         | 1                      | 0.53                                    | 2.7              | 13                                      | 4                             | 30.8                  | 50.0                                             | 50.0       | 0.0         |
| 7452: Material handlers                                                                | 92                         | 3                      | 0.95                                    | 3.4              | 743                                     | 56                            | 7.5                   | 66.1                                             | 28.6       | 5.4         |
| 7521: Heavy equipment operators (except crane)                                         | 18                         | 0                      | 0.33                                    | 3.5              | 119                                     | 3                             | 2.5                   | 33.3                                             | 66.7       | 0.0         |
| 7611: Construction trades helpers and labourers                                        | 63                         | 1                      | 1.00                                    | 3.6              | 488                                     | 288                           | 59.0                  | 50.0                                             | 48.6       | 1.4         |
| 7612: Other trades helpers and labourers                                               | 10                         | 0                      | 2.54                                    | 1.4              | 31                                      | 2                             | 6.5                   | 0.0                                              | 100.0      | 0.0         |
| 8421: Chain saw and skidder operators                                                  | 14                         | 0                      | 4.59                                    | 4.4              | 272                                     | 259                           | 95.2                  | 52.1                                             | 46.7       | 1.2         |
| 9224: Supervisors, furniture and fixtures manufacturing                                | 14                         | 0                      | 3.11                                    | 2.8              | 24                                      | 21                            | 87.5                  | 23.8                                             | 38.1       | 38.1        |

| NOC 2011 occupation code and title                                       | Wood dust measurement data |                        |                                         |                  | CANJEM cell estimates, period 1930-2005 |                               |                       |                                                  |            |             |
|--------------------------------------------------------------------------|----------------------------|------------------------|-----------------------------------------|------------------|-----------------------------------------|-------------------------------|-----------------------|--------------------------------------------------|------------|-------------|
|                                                                          | N <sup>a</sup>             | ND <sup>b</sup><br>(n) | GM <sup>c</sup><br>(mg/m <sup>3</sup> ) | GSD <sup>d</sup> | N <sup>e</sup>                          | N <sub>exp</sub> <sup>f</sup> | P <sup>g</sup><br>(%) | Relative percentage of<br>exposed jobs by rating |            |             |
|                                                                          |                            |                        |                                         |                  |                                         |                               |                       | Low<br>(%)                                       | Med<br>(%) | High<br>(%) |
| 9227: Supervisors, other products manufacturing and assembly             | 10                         | 0                      | 2.27                                    | 3.6              | 16                                      | 1                             | 6.3                   | 0.0                                              | 0.0        | 100.0       |
| 9431: Sawmill machine operators                                          | 1127                       | 40                     | 0.93                                    | 4.0              | 10                                      | 10                            | 100.0                 | 10.0                                             | 10.0       | 80.0        |
| 9434: Other wood processing machine operators                            | 441                        | 9                      | 1.07                                    | 3.5              | 13                                      | 8                             | 61.5                  | 37.5                                             | 50.0       | 12.5        |
| 9436: Lumber graders and other wood processing inspectors and graders    | 93                         | 5                      | 0.60                                    | 2.5              | 11                                      | 10                            | 90.9                  | 60.0                                             | 20.0       | 20.0        |
| 9437: Woodworking machine operators                                      | 1616                       | 23                     | 2.67                                    | 4.0              | 57                                      | 54                            | 94.7                  | 5.6                                              | 24.1       | 70.4        |
| 9532: Furniture and fixture assemblers and inspectors                    | 143                        | 0                      | 3.08                                    | 4.0              | 45                                      | 34                            | 75.6                  | 32.4                                             | 32.4       | 35.3        |
| 9533: Other wood products assemblers and inspectors                      | 135                        | 6                      | 2.06                                    | 5.2              | 19                                      | 19                            | 100.0                 | 5.3                                              | 42.1       | 52.6        |
| 9534: Furniture finishers and refinishers                                | 41                         | 1                      | 3.48                                    | 3.1              | 9                                       | 7                             | 77.8                  | 14.3                                             | 57.1       | 28.6        |
| 9536: Industrial painters, coaters and metal finishing process operators | 18                         | 1                      | 2.27                                    | 2.5              | 107                                     | 8                             | 7.5                   | 25.0                                             | 75.0       | 0.0         |
| 9612: Labourers in metal fabrication                                     | 20                         | 0                      | 2.45                                    | 3.8              | 162                                     | 6                             | 3.7                   | 66.7                                             | 16.7       | 16.7        |
| 9614: Labourers in wood, pulp and paper processing                       | 336                        | 13                     | 0.99                                    | 4.8              | 63                                      | 54                            | 85.7                  | 22.2                                             | 50.0       | 27.8        |
| 9619: Other labourers in processing, manufacturing and utilities         | 97                         | 0                      | 2.82                                    | 3.6              | 425                                     | 26                            | 6.1                   | 38.5                                             | 26.9       | 34.6        |

<sup>a</sup>Number of samples

<sup>b</sup>Number of non-detected samples

<sup>c</sup>Geometric mean, computed with the robust Regression on order statistics (ROS) method for non-detects (Helsel, 2012)

<sup>d</sup>Geometric standard deviation, computed with the robust ROS method

<sup>e</sup>Total number of jobs evaluated

<sup>f</sup>Number of jobs exposed to wood dust

<sup>g</sup>Probability of exposure to wood dust

**Table S2. Fixed and random-effects model parameters and variance components**

| <b>Model parameters</b>                                                                | <b>Estimate<sup>a</sup></b> | <b>SD<sup>b</sup></b> |
|----------------------------------------------------------------------------------------|-----------------------------|-----------------------|
| <b>Fixed-effects terms</b>                                                             |                             |                       |
| Intercept                                                                              | 3.029                       | 0.227                 |
| Sample year (reference = 1978)                                                         | -0.034                      | 0.004                 |
| Sample duration (ln[minutes])                                                          | -0.618                      | 0.026                 |
| Sample type (reference=area)                                                           |                             |                       |
| Personal                                                                               | 0.542                       | 0.039                 |
| Province (reference = British Columbia)                                                |                             |                       |
| Ontario                                                                                | 0.517                       | 0.047                 |
| Proportion of jobs in cell, medium intensity                                           | 0.223                       | 0.215                 |
| Proportion of jobs in cell, high intensity                                             | 0.858                       | 0.313                 |
| <b>Variance components</b>                                                             |                             |                       |
| Within occupation                                                                      | 1.221                       | 0.012                 |
| Between occupation                                                                     | 0.435                       | 0.081                 |
| <b>Random-effects (NOC code and title)</b>                                             |                             |                       |
| 1241: Administrative assistants                                                        | 0.387                       | 0.294                 |
| 2252: Industrial designers                                                             | -0.521                      | 0.254                 |
| 4021: College and other vocational instructors                                         | -0.319                      | 0.161                 |
| 4031: Secondary school teachers                                                        | 0.131                       | 0.163                 |
| 6733: Janitors, caretakers and building superintendents                                | 0.294                       | 0.148                 |
| 7231: Machinists and machining and tooling inspectors                                  | -0.454                      | 0.272                 |
| 7232: Tool and die makers                                                              | 0.455                       | 0.283                 |
| 7237: Welders and related machine operators                                            | -0.273                      | 0.292                 |
| 7242: Industrial electricians                                                          | 0.269                       | 0.162                 |
| 7271: Carpenters                                                                       | 0.209                       | 0.156                 |
| 7272: Cabinetmakers                                                                    | -0.095                      | 0.211                 |
| 7311: Construction millwrights and industrial mechanics                                | 0.571                       | 0.301                 |
| 7321: Automotive service technicians, truck and bus mechanics and mechanical repairers | -0.138                      | 0.306                 |
| 7384: Other trades and related occupations, n.e.c. <sup>c</sup>                        | -0.217                      | 0.163                 |
| 7452: Material handlers                                                                | -0.501                      | 0.260                 |
| 7521: Heavy equipment operators (except crane)                                         | -0.295                      | 0.178                 |
| 7611: Construction trades helpers and labourers                                        | 0.222                       | 0.304                 |
| 7612: Other trades helpers and labourers                                               | 0.827                       | 0.291                 |
| 8421: Chain saw and skidder operators                                                  | 0.244                       | 0.270                 |
| 9224: Supervisors, furniture and fixtures manufacturing                                | -0.121                      | 0.322                 |
| 9227: Supervisors, other products manufacturing and assembly                           | -0.524                      | 0.193                 |
| 9431: Sawmill machine operators                                                        | -0.263                      | 0.110                 |
| 9434: Other wood processing machine operators                                          | -0.565                      | 0.158                 |
| 9436: Lumber graders and other wood processing inspectors and graders                  | 0.074                       | 0.167                 |

| <b>Model parameters</b>                                                  | <b>Estimate<sup>a</sup></b> | <b>SD<sup>b</sup></b> |
|--------------------------------------------------------------------------|-----------------------------|-----------------------|
| 9437: Woodworking machine operators                                      | 0.281                       | 0.135                 |
| 9532: Furniture and fixture assemblers and inspectors                    | -0.065                      | 0.161                 |
| 9533: Other wood products assemblers and inspectors                      | 0.457                       | 0.196                 |
| 9534: Furniture finishers and refinishers                                | -0.083                      | 0.259                 |
| 9536: Industrial painters, coaters and metal finishing process operators | 0.115                       | 0.245                 |
| 9612: Labourers in metal fabrication                                     | -0.380                      | 0.113                 |
| 9614: Labourers in wood, pulp and paper processing                       | 0.390                       | 0.151                 |

<sup>a</sup>Median of the posterior distribution taken as the point estimate

<sup>b</sup>Standard deviation of the posterior distribution of the model parameter

<sup>c</sup>n.e.c.: Not elsewhere classified

**Table S3. Predicted geometric mean wood dust concentrations for 1989 for all occupations with at least one exposed job in CANJEM for period 1930-2005 (n=198)**

| NOC 2011 occupation code and title                                                | CANJEM cell estimates, period 1930-2005 |                               |                    |                                               |         |          | Predicted wood dust GM (90%CI) for year 1989 (mg/m <sup>3</sup> ) <sup>d</sup> |                                    |
|-----------------------------------------------------------------------------------|-----------------------------------------|-------------------------------|--------------------|-----------------------------------------------|---------|----------|--------------------------------------------------------------------------------|------------------------------------|
|                                                                                   | N <sup>a</sup>                          | N <sub>exp</sub> <sup>b</sup> | P <sup>c</sup> (%) | Relative percentage of exposed jobs by rating |         |          | Ratings only                                                                   | Combined ratings and random effect |
|                                                                                   |                                         |                               |                    | Low (%)                                       | Med (%) | High (%) |                                                                                |                                    |
| 0015: Senior managers - trade, broadcasting and other services, n.e.c.            | 5                                       | 1                             | 20.0               | 0.0                                           | 100.0   | 0.0      | 0.97 (0.77-1.27)                                                               |                                    |
| 0114: Other administrative services managers                                      | 347                                     | 4                             | 1.2                | 75.0                                          | 25.0    | 0.0      | 0.80 (0.64-0.99)                                                               |                                    |
| 0601: Corporate sales managers                                                    | 66                                      | 1                             | 1.5                | 0.0                                           | 100.0   | 0.0      | 0.97 (0.77-1.27)                                                               |                                    |
| 0621: Retail and wholesale trade managers                                         | 629                                     | 15                            | 2.4                | 80.0                                          | 20.0    | 0.0      | 0.79 (0.63-0.98)                                                               |                                    |
| 0631: Restaurant and food service managers                                        | 157                                     | 1                             | 0.6                | 100.0                                         | 0.0     | 0.0      | 0.76 (0.56-0.95)                                                               |                                    |
| 0632: Accommodation service managers                                              | 39                                      | 1                             | 2.6                | 0.0                                           | 100.0   | 0.0      | 0.97 (0.77-1.27)                                                               |                                    |
| 0651: Managers in customer and personal services, n.e.c.                          | 17                                      | 1                             | 5.9                | 0.0                                           | 100.0   | 0.0      | 0.97 (0.77-1.27)                                                               |                                    |
| 0711: Construction managers                                                       | 89                                      | 37                            | 41.6               | 81.1                                          | 18.9    | 0.0      | 0.79 (0.62-0.98)                                                               |                                    |
| 0731: Managers in transportation                                                  | 18                                      | 1                             | 5.6                | 0.0                                           | 100.0   | 0.0      | 0.97 (0.77-1.27)                                                               |                                    |
| 0821: Managers in agriculture                                                     | 110                                     | 23                            | 20.9               | 34.8                                          | 65.2    | 0.0      | 0.89 (0.73-1.08)                                                               |                                    |
| 0911: Manufacturing managers                                                      | 145                                     | 5                             | 3.4                | 40.0                                          | 40.0    | 20.0     | 0.99 (0.85-1.16)                                                               |                                    |
| 0912: Utilities managers                                                          | 1                                       | 1                             | 100.0              | 100.0                                         | 0.0     | 0.0      | 0.76 (0.56-0.95)                                                               |                                    |
| 1121: Human resources professionals                                               | 25                                      | 1                             | 4.0                | 100.0                                         | 0.0     | 0.0      | 0.76 (0.56-0.95)                                                               |                                    |
| 1122: Professional occupations in business management consulting                  | 52                                      | 1                             | 1.9                | 100.0                                         | 0.0     | 0.0      | 0.76 (0.56-0.95)                                                               |                                    |
| 1211: Supervisors, general office and administrative support workers              | 55                                      | 2                             | 3.6                | 100.0                                         | 0.0     | 0.0      | 0.76 (0.56-0.95)                                                               |                                    |
| 1215: Supervisors, supply chain, tracking and scheduling coordination occupations | 97                                      | 8                             | 8.2                | 75.0                                          | 25.0    | 0.0      | 0.80 (0.64-0.99)                                                               |                                    |
| 1224: Property administrators                                                     | 42                                      | 6                             | 14.3               | 33.3                                          | 66.7    | 0.0      | 0.90 (0.73-1.09)                                                               |                                    |
| 1225: Purchasing agents and officers                                              | 31                                      | 1                             | 3.2                | 100.0                                         | 0.0     | 0.0      | 0.76 (0.56-0.95)                                                               |                                    |
| 1241: Administrative assistants                                                   | 663                                     | 2                             | 0.3                | 100.0                                         | 0.0     | 0.0      | 0.76 (0.56-0.95)                                                               | 1.11 (0.70-1.77)                   |

| NOC 2011 occupation code and title                                           | CANJEM cell estimates, period 1930-2005 |                   |                       |                                               |         |          | Predicted wood dust GM (90%CI) for year 1989 (mg/m <sup>3</sup> ) <sup>d</sup> |                                    |
|------------------------------------------------------------------------------|-----------------------------------------|-------------------|-----------------------|-----------------------------------------------|---------|----------|--------------------------------------------------------------------------------|------------------------------------|
|                                                                              | N <sup>a</sup>                          | Nexp <sup>b</sup> | P <sup>c</sup><br>(%) | Relative percentage of exposed jobs by rating |         |          | Ratings only                                                                   | Combined ratings and random effect |
|                                                                              |                                         |                   |                       | Low (%)                                       | Med (%) | High (%) |                                                                                |                                    |
| 1411: General office support workers                                         | 790                                     | 4                 | 0.5                   | 100.0                                         | 0.0     | 0.0      | 0.76 (0.56-0.95)                                                               |                                    |
| 1414: Receptionists                                                          | 316                                     | 1                 | 0.3                   | 100.0                                         | 0.0     | 0.0      | 0.76 (0.56-0.95)                                                               |                                    |
| 1423: Desktop publishing operators and related occupations                   | 21                                      | 1                 | 4.8                   | 0.0                                           | 100.0   | 0.0      | 0.97 (0.77-1.27)                                                               |                                    |
| 1431: Accounting and related clerks                                          | 551                                     | 6                 | 1.1                   | 100.0                                         | 0.0     | 0.0      | 0.76 (0.56-0.95)                                                               |                                    |
| 1432: Payroll clerks                                                         | 48                                      | 1                 | 2.1                   | 100.0                                         | 0.0     | 0.0      | 0.76 (0.56-0.95)                                                               |                                    |
| 1512: Letter carriers                                                        | 60                                      | 1                 | 1.7                   | 100.0                                         | 0.0     | 0.0      | 0.76 (0.56-0.95)                                                               |                                    |
| 1513: Couriers, messengers and door-to-door distributors                     | 185                                     | 4                 | 2.2                   | 100.0                                         | 0.0     | 0.0      | 0.76 (0.56-0.95)                                                               |                                    |
| 1521: Shippers and receivers                                                 | 304                                     | 11                | 3.6                   | 81.8                                          | 9.1     | 9.1      | 0.84 (0.66-1.02)                                                               |                                    |
| 1522: Storekeepers and partspersons                                          | 188                                     | 7                 | 3.7                   | 57.1                                          | 28.6    | 14.3     | 0.92 (0.77-1.08)                                                               |                                    |
| 1523: Production logistics co-ordinators                                     | 70                                      | 2                 | 2.9                   | 50.0                                          | 50.0    | 0.0      | 0.86 (0.71-1.03)                                                               |                                    |
| 2122: Forestry professionals                                                 | 3                                       | 1                 | 33.3                  | 100.0                                         | 0.0     | 0.0      | 0.76 (0.56-0.95)                                                               |                                    |
| 2123: Agricultural representatives, consultants and specialists              | 6                                       | 1                 | 16.7                  | 0.0                                           | 100.0   | 0.0      | 0.97 (0.77-1.27)                                                               |                                    |
| 2131: Civil engineers                                                        | 74                                      | 3                 | 4.1                   | 100.0                                         | 0.0     | 0.0      | 0.76 (0.56-0.95)                                                               |                                    |
| 2141: Industrial and manufacturing engineers                                 | 43                                      | 1                 | 2.3                   | 0.0                                           | 100.0   | 0.0      | 0.97 (0.77-1.27)                                                               |                                    |
| 2151: Architects                                                             | 25                                      | 1                 | 4.0                   | 100.0                                         | 0.0     | 0.0      | 0.76 (0.56-0.95)                                                               |                                    |
| 2154: Land surveyors                                                         | 40                                      | 2                 | 5.0                   | 50.0                                          | 50.0    | 0.0      | 0.86 (0.71-1.03)                                                               |                                    |
| 2211: Chemical technologists and technicians                                 | 43                                      | 1                 | 2.3                   | 0.0                                           | 100.0   | 0.0      | 0.97 (0.77-1.27)                                                               |                                    |
| 2223: Forestry technologists and technicians                                 | 11                                      | 5                 | 45.5                  | 80.0                                          | 20.0    | 0.0      | 0.79 (0.63-0.98)                                                               |                                    |
| 2231: Civil engineering technologists and technicians                        | 10                                      | 2                 | 20.0                  | 50.0                                          | 50.0    | 0.0      | 0.86 (0.71-1.03)                                                               |                                    |
| 2232: Mechanical engineering technologists and technicians                   | 28                                      | 2                 | 7.1                   | 0.0                                           | 100.0   | 0.0      | 0.97 (0.77-1.27)                                                               |                                    |
| 2233: Industrial engineering and manufacturing technologists and technicians | 39                                      | 1                 | 2.6                   | 100.0                                         | 0.0     | 0.0      | 0.76 (0.56-0.95)                                                               |                                    |
| 2241: Electrical and electronics engineering technologists and technicians   | 58                                      | 3                 | 5.2                   | 100.0                                         | 0.0     | 0.0      | 0.76 (0.56-0.95)                                                               |                                    |
| 2242: Electronic service technicians (household and business equipment)      | 59                                      | 4                 | 6.8                   | 75.0                                          | 25.0    | 0.0      | 0.80 (0.64-0.99)                                                               |                                    |



| NOC 2011 occupation code and title                                                              | CANJEM cell estimates, period 1930-2005 |                   |                       |                                               |         |          | Predicted wood dust GM (90%CI) for year 1989 (mg/m <sup>3</sup> ) <sup>d</sup> |                                    |
|-------------------------------------------------------------------------------------------------|-----------------------------------------|-------------------|-----------------------|-----------------------------------------------|---------|----------|--------------------------------------------------------------------------------|------------------------------------|
|                                                                                                 | N <sup>a</sup>                          | Nexp <sup>b</sup> | P <sup>c</sup><br>(%) | Relative percentage of exposed jobs by rating |         |          | Ratings only                                                                   | Combined ratings and random effect |
|                                                                                                 |                                         |                   |                       | Low (%)                                       | Med (%) | High (%) |                                                                                |                                    |
| 2252: Industrial designers                                                                      | 21                                      | 4                 | 19.0                  | 75.0                                          | 25.0    | 0.0      | 0.80 (0.64-0.99)                                                               | 0.48 (0.32-0.70)                   |
| 2262: Engineering inspectors and regulatory officers                                            | 15                                      | 2                 | 13.3                  | 50.0                                          | 50.0    | 0.0      | 0.86 (0.71-1.03)                                                               |                                    |
| 2263: Inspectors in public and environmental health and occupational health and safety          | 21                                      | 1                 | 4.8                   | 0.0                                           | 100.0   | 0.0      | 0.97 (0.77-1.27)                                                               |                                    |
| 2264: Construction inspectors                                                                   | 19                                      | 1                 | 5.3                   | 0.0                                           | 100.0   | 0.0      | 0.97 (0.77-1.27)                                                               |                                    |
| 4021: College and other vocational instructors                                                  | 142                                     | 9                 | 6.3                   | 11.1                                          | 66.7    | 22.2     | 1.08 (0.92-1.31)                                                               | 0.79 (0.63-0.98)                   |
| 4031: Secondary school teachers                                                                 | 257                                     | 6                 | 2.3                   | 83.3                                          | 16.7    | 0.0      | 0.79 (0.62-0.97)                                                               | 0.90 (0.75-1.07)                   |
| 4032: Elementary school and kindergarten teachers                                               | 276                                     | 1                 | 0.4                   | 100.0                                         | 0.0     | 0.0      | 0.76 (0.56-0.95)                                                               |                                    |
| 4154: Professional occupations in religion                                                      | 47                                      | 1                 | 2.1                   | 0.0                                           | 100.0   | 0.0      | 0.97 (0.77-1.27)                                                               |                                    |
| 4163: Business development officers and marketing researchers and consultants                   | 24                                      | 1                 | 4.2                   | 100.0                                         | 0.0     | 0.0      | 0.76 (0.56-0.95)                                                               |                                    |
| 4311: Police officers (except commissioned)                                                     | 112                                     | 1                 | 0.9                   | 0.0                                           | 100.0   | 0.0      | 0.97 (0.77-1.27)                                                               |                                    |
| 4313: Non-commissioned ranks of the Canadian Forces                                             | 712                                     | 1                 | 0.1                   | 100.0                                         | 0.0     | 0.0      | 0.76 (0.56-0.95)                                                               |                                    |
| 4422: Correctional service officers                                                             | 21                                      | 1                 | 4.8                   | 0.0                                           | 100.0   | 0.0      | 0.97 (0.77-1.27)                                                               |                                    |
| 4423: By-law enforcement and other regulatory officers, n.e.c.                                  | 14                                      | 1                 | 7.1                   | 0.0                                           | 100.0   | 0.0      | 0.97 (0.77-1.27)                                                               |                                    |
| 5136: Painters, sculptors and other visual artists                                              | 17                                      | 3                 | 17.6                  | 33.3                                          | 66.7    | 0.0      | 0.90 (0.73-1.09)                                                               |                                    |
| 5212: Technical occupations related to museums and art galleries                                | 2                                       | 1                 | 50.0                  | 0.0                                           | 100.0   | 0.0      | 0.97 (0.77-1.27)                                                               |                                    |
| 5223: Graphic arts technicians                                                                  | 6                                       | 2                 | 33.3                  | 0.0                                           | 100.0   | 0.0      | 0.97 (0.77-1.27)                                                               |                                    |
| 5227: Support occupations in motion pictures, broadcasting, photography and the performing arts | 9                                       | 1                 | 11.1                  | 0.0                                           | 100.0   | 0.0      | 0.97 (0.77-1.27)                                                               |                                    |
| 5242: Interior designers and interior decorators                                                | 9                                       | 3                 | 33.3                  | 33.3                                          | 33.3    | 33.3     | 1.09 (0.93-1.29)                                                               |                                    |
| 5243: Theatre, fashion, exhibit and other creative designers                                    | 29                                      | 5                 | 17.2                  | 20.0                                          | 80.0    | 0.0      | 0.93 (0.75-1.15)                                                               |                                    |
| 5244: Artisans and craftspersons                                                                | 32                                      | 4                 | 12.5                  | 25.0                                          | 75.0    | 0.0      | 0.92 (0.74-1.12)                                                               |                                    |
| 6221: Technical sales specialists - wholesale trade                                             | 254                                     | 4                 | 1.6                   | 75.0                                          | 25.0    | 0.0      | 0.80 (0.64-0.99)                                                               |                                    |

| NOC 2011 occupation code and title                                             | CANJEM cell estimates, period 1930-2005 |                   |                    |                                               |         |          | Predicted wood dust GM (90%CI) for year 1989 (mg/m <sup>3</sup> ) <sup>d</sup> |                                    |
|--------------------------------------------------------------------------------|-----------------------------------------|-------------------|--------------------|-----------------------------------------------|---------|----------|--------------------------------------------------------------------------------|------------------------------------|
|                                                                                | N <sup>a</sup>                          | Nexp <sup>b</sup> | P <sup>c</sup> (%) | Relative percentage of exposed jobs by rating |         |          | Ratings only                                                                   | Combined ratings and random effect |
|                                                                                |                                         |                   |                    | Low (%)                                       | Med (%) | High (%) |                                                                                |                                    |
| 6322: Cooks                                                                    | 306                                     | 3                 | 1.0                | 66.7                                          | 33.3    | 0.0      | 0.82 (0.66-1.00)                                                               |                                    |
| 6331: Butchers, meat cutters and fishmongers - retail and wholesale            | 102                                     | 38                | 37.3               | 86.8                                          | 13.2    | 0.0      | 0.78 (0.60-0.97)                                                               |                                    |
| 6342: Tailors, dressmakers, furriers and milliners                             | 204                                     | 6                 | 2.9                | 50.0                                          | 50.0    | 0.0      | 0.86 (0.71-1.03)                                                               |                                    |
| 6343: Shoe repairers and shoemakers                                            | 147                                     | 14                | 9.5                | 50.0                                          | 42.9    | 7.1      | 0.90 (0.75-1.06)                                                               |                                    |
| 6344: Jewellers, jewellery and watch repairers and related occupations         | 66                                      | 1                 | 1.5                | 100.0                                         | 0.0     | 0.0      | 0.76 (0.56-0.95)                                                               |                                    |
| 6345: Upholsterers                                                             | 37                                      | 18                | 48.6               | 50.0                                          | 50.0    | 0.0      | 0.86 (0.71-1.03)                                                               |                                    |
| 6346: Funeral directors and embalmers                                          | 3                                       | 1                 | 33.3               | 100.0                                         | 0.0     | 0.0      | 0.76 (0.56-0.95)                                                               |                                    |
| 6411: Sales and account representatives - wholesale trade (non-technical)      | 408                                     | 3                 | 0.7                | 33.3                                          | 66.7    | 0.0      | 0.90 (0.73-1.09)                                                               |                                    |
| 6421: Retail salespersons                                                      | 876                                     | 15                | 1.7                | 66.7                                          | 33.3    | 0.0      | 0.82 (0.66-1.00)                                                               |                                    |
| 6541: Security guards and related security service occupations                 | 383                                     | 1                 | 0.3                | 0.0                                           | 100.0   | 0.0      | 0.97 (0.77-1.27)                                                               |                                    |
| 6552: Other customer and information services representatives                  | 60                                      | 2                 | 3.3                | 50.0                                          | 50.0    | 0.0      | 0.86 (0.71-1.03)                                                               |                                    |
| 6611: Cashiers                                                                 | 161                                     | 1                 | 0.6                | 100.0                                         | 0.0     | 0.0      | 0.76 (0.56-0.95)                                                               |                                    |
| 6622: Store shelf stockers, clerks and order fillers                           | 66                                      | 6                 | 9.1                | 100.0                                         | 0.0     | 0.0      | 0.76 (0.56-0.95)                                                               |                                    |
| 6623: Other sales related occupations                                          | 127                                     | 2                 | 1.6                | 50.0                                          | 50.0    | 0.0      | 0.86 (0.71-1.03)                                                               |                                    |
| 6711: Food counter attendants, kitchen helpers and related support occupations | 346                                     | 4                 | 1.2                | 100.0                                         | 0.0     | 0.0      | 0.76 (0.56-0.95)                                                               |                                    |
| 6722: Operators and attendants in amusement, recreation and sport              | 26                                      | 1                 | 3.8                | 0.0                                           | 100.0   | 0.0      | 0.97 (0.77-1.27)                                                               |                                    |
| 6731: Light duty cleaners                                                      | 532                                     | 9                 | 1.7                | 22.2                                          | 66.7    | 11.1     | 0.99 (0.83-1.18)                                                               |                                    |
| 6732: Specialized cleaners                                                     | 89                                      | 3                 | 3.4                | 100.0                                         | 0.0     | 0.0      | 0.76 (0.56-0.95)                                                               |                                    |
| 6733: Janitors, caretakers and building superintendents                        | 347                                     | 55                | 15.9               | 34.5                                          | 58.2    | 7.3      | 0.93 (0.78-1.11)                                                               | 1.25 (1.03-1.52)                   |

| NOC 2011 occupation code and title                                                                               | CANJEM cell estimates, period 1930-2005 |                   |                    |                                               |         |          | Predicted wood dust GM (90%CI) for year 1989 (mg/m <sup>3</sup> ) <sup>d</sup> |                                    |
|------------------------------------------------------------------------------------------------------------------|-----------------------------------------|-------------------|--------------------|-----------------------------------------------|---------|----------|--------------------------------------------------------------------------------|------------------------------------|
|                                                                                                                  | N <sup>a</sup>                          | Nexp <sup>b</sup> | P <sup>c</sup> (%) | Relative percentage of exposed jobs by rating |         |          | Ratings only                                                                   | Combined ratings and random effect |
|                                                                                                                  |                                         |                   |                    | Low (%)                                       | Med (%) | High (%) |                                                                                |                                    |
| 7201: Contractors and supervisors, machining, metal forming, shaping and erecting trades and related occupations | 56                                      | 3                 | 5.4                | 66.7                                          | 33.3    | 0.0      | 0.82 (0.66-1.00)                                                               |                                    |
| 7202: Contractors and supervisors, electrical trades and telecommunications occupations                          | 41                                      | 8                 | 19.5               | 75.0                                          | 25.0    | 0.0      | 0.80 (0.64-0.99)                                                               |                                    |
| 7203: Contractors and supervisors, pipefitting trades                                                            | 16                                      | 1                 | 6.3                | 0.0                                           | 100.0   | 0.0      | 0.97 (0.77-1.27)                                                               |                                    |
| 7204: Contractors and supervisors, carpentry trades                                                              | 21                                      | 17                | 81.0               | 35.3                                          | 58.8    | 5.9      | 0.92 (0.77-1.10)                                                               |                                    |
| 7205: Contractors and supervisors, other construction trades, installers, repairers and servicers                | 51                                      | 19                | 37.3               | 57.9                                          | 42.1    | 0.0      | 0.84 (0.69-1.02)                                                               |                                    |
| 7231: Machinists and machining and tooling inspectors                                                            | 195                                     | 2                 | 1.0                | 0.0                                           | 100.0   | 0.0      | 0.97 (0.77-1.27)                                                               | 0.62 (0.41-0.94)                   |
| 7232: Tool and die makers                                                                                        | 64                                      | 5                 | 7.8                | 40.0                                          | 20.0    | 40.0     | 1.12 (0.94-1.34)                                                               | 1.77 (1.13-2.81)                   |
| 7233: Sheet metal workers                                                                                        | 112                                     | 12                | 10.7               | 41.7                                          | 58.3    | 0.0      | 0.88 (0.72-1.06)                                                               |                                    |
| 7235: Structural metal and platework fabricators and fitters                                                     | 32                                      | 4                 | 12.5               | 25.0                                          | 75.0    | 0.0      | 0.92 (0.74-1.12)                                                               |                                    |
| 7236: Ironworkers                                                                                                | 46                                      | 6                 | 13.0               | 66.7                                          | 33.3    | 0.0      | 0.82 (0.66-1.00)                                                               |                                    |
| 7237: Welders and related machine operators                                                                      | 260                                     | 3                 | 1.2                | 100.0                                         | 0.0     | 0.0      | 0.76 (0.56-0.95)                                                               |                                    |
| 7241: Electricians (except industrial and power system)                                                          | 124                                     | 71                | 57.3               | 66.2                                          | 33.8    | 0.0      | 0.82 (0.67-1.00)                                                               |                                    |
| 7242: Industrial electricians                                                                                    | 76                                      | 8                 | 10.5               | 62.5                                          | 37.5    | 0.0      | 0.83 (0.68-1.01)                                                               | 0.63 (0.39-1.01)                   |
| 7244: Electrical power line and cable workers                                                                    | 40                                      | 1                 | 2.5                | 100.0                                         | 0.0     | 0.0      | 0.76 (0.56-0.95)                                                               |                                    |
| 7245: Telecommunications line and cable workers                                                                  | 12                                      | 2                 | 16.7               | 100.0                                         | 0.0     | 0.0      | 0.76 (0.56-0.95)                                                               |                                    |
| 7246: Telecommunications installation and repair workers                                                         | 38                                      | 4                 | 10.5               | 100.0                                         | 0.0     | 0.0      | 0.76 (0.56-0.95)                                                               |                                    |
| 7247: Cable television service and maintenance technicians                                                       | 1                                       | 1                 | 100.0              | 100.0                                         | 0.0     | 0.0      | 0.76 (0.56-0.95)                                                               |                                    |
| 7251: Plumbers                                                                                                   | 101                                     | 26                | 25.7               | 88.5                                          | 11.5    | 0.0      | 0.78 (0.60-0.97)                                                               |                                    |
| 7252: Steamfitters, pipefitters and sprinkler system installers                                                  | 97                                      | 10                | 10.3               | 70.0                                          | 30.0    | 0.0      | 0.81 (0.66-0.99)                                                               |                                    |
| 7271: Carpenters                                                                                                 | 343                                     | 320               | 93.3               | 15.0                                          | 78.8    | 6.3      | 0.98 (0.80-1.20)                                                               | 1.28 (1.04-1.57)                   |
| 7272: Cabinetmakers                                                                                              | 105                                     | 102               | 97.1               | 3.9                                           | 36.3    | 59.8     | 1.38 (1.11-1.78)                                                               | 1.71 (1.50-1.95)                   |
| 7281: Bricklayers                                                                                                | 105                                     | 11                | 10.5               | 81.8                                          | 18.2    | 0.0      | 0.79 (0.62-0.98)                                                               |                                    |
| 7282: Concrete finishers                                                                                         | 39                                      | 8                 | 20.5               | 62.5                                          | 37.5    | 0.0      | 0.83 (0.68-1.01)                                                               |                                    |

| NOC 2011 occupation code and title                                                     | CANJEM cell estimates, period 1930-2005 |                               |                    |                                               |         |          | Predicted wood dust GM (90%CI) for year 1989 (mg/m <sup>3</sup> ) <sup>d</sup> |                                    |
|----------------------------------------------------------------------------------------|-----------------------------------------|-------------------------------|--------------------|-----------------------------------------------|---------|----------|--------------------------------------------------------------------------------|------------------------------------|
|                                                                                        | N <sup>a</sup>                          | N <sub>exp</sub> <sup>b</sup> | P <sup>c</sup> (%) | Relative percentage of exposed jobs by rating |         |          | Ratings only                                                                   | Combined ratings and random effect |
|                                                                                        |                                         |                               |                    | Low (%)                                       | Med (%) | High (%) |                                                                                |                                    |
| 7283: Tilesetters                                                                      | 16                                      | 5                             | 31.3               | 100.0                                         | 0.0     | 0.0      | 0.76 (0.56-0.95)                                                               |                                    |
| 7284: Plasterers, drywall installers and finishers and lathers                         | 47                                      | 12                            | 25.5               | 58.3                                          | 41.7    | 0.0      | 0.84 (0.69-1.02)                                                               |                                    |
| 7291: Roofers and shinglers                                                            | 38                                      | 11                            | 28.9               | 81.8                                          | 18.2    | 0.0      | 0.79 (0.62-0.98)                                                               |                                    |
| 7292: Glaziers                                                                         | 11                                      | 6                             | 54.5               | 50.0                                          | 50.0    | 0.0      | 0.86 (0.71-1.03)                                                               |                                    |
| 7293: Insulators                                                                       | 23                                      | 6                             | 26.1               | 83.3                                          | 16.7    | 0.0      | 0.79 (0.62-0.97)                                                               |                                    |
| 7294: Painters and decorators (except interior decorators)                             | 193                                     | 63                            | 32.6               | 20.6                                          | 77.8    | 1.6      | 0.94 (0.76-1.15)                                                               |                                    |
| 7295: Floor covering installers                                                        | 25                                      | 5                             | 20.0               | 20.0                                          | 0.0     | 80.0     | 1.49 (1.11-2.10)                                                               |                                    |
| 7301: Contractors and supervisors, mechanic trades                                     | 84                                      | 2                             | 2.4                | 50.0                                          | 50.0    | 0.0      | 0.86 (0.71-1.03)                                                               |                                    |
| 7305: Supervisors, motor transport and other ground transit operators                  | 25                                      | 1                             | 4.0                | 0.0                                           | 100.0   | 0.0      | 0.97 (0.77-1.27)                                                               |                                    |
| 7311: Construction millwrights and industrial mechanics                                | 169                                     | 10                            | 5.9                | 40.0                                          | 60.0    | 0.0      | 0.88 (0.72-1.06)                                                               | 0.80 (0.58-1.09)                   |
| 7312: Heavy-duty equipment mechanics                                                   | 61                                      | 4                             | 6.6                | 25.0                                          | 50.0    | 25.0     | 1.06 (0.91-1.25)                                                               |                                    |
| 7313: Refrigeration and air conditioning mechanics                                     | 19                                      | 2                             | 10.5               | 50.0                                          | 50.0    | 0.0      | 0.86 (0.71-1.03)                                                               |                                    |
| 7314: Railway carmen/women                                                             | 66                                      | 22                            | 33.3               | 22.7                                          | 54.5    | 22.7     | 1.06 (0.90-1.25)                                                               |                                    |
| 7315: Aircraft mechanics and aircraft inspectors                                       | 115                                     | 2                             | 1.7                | 50.0                                          | 50.0    | 0.0      | 0.86 (0.71-1.03)                                                               |                                    |
| 7316: Machine fitters                                                                  | 30                                      | 2                             | 6.7                | 50.0                                          | 50.0    | 0.0      | 0.86 (0.71-1.03)                                                               |                                    |
| 7321: Automotive service technicians, truck and bus mechanics and mechanical repairers | 295                                     | 2                             | 0.7                | 100.0                                         | 0.0     | 0.0      | 0.76 (0.56-0.95)                                                               | 1.33 (0.84-2.16)                   |
| 7322: Motor vehicle body repairers                                                     | 97                                      | 3                             | 3.1                | 66.7                                          | 33.3    | 0.0      | 0.82 (0.66-1.00)                                                               |                                    |
| 7331: Oil and solid fuel heating mechanics                                             | 11                                      | 3                             | 27.3               | 100.0                                         | 0.0     | 0.0      | 0.76 (0.56-0.95)                                                               |                                    |
| 7332: Appliance servicers and repairers                                                | 19                                      | 1                             | 5.3                | 100.0                                         | 0.0     | 0.0      | 0.76 (0.56-0.95)                                                               |                                    |
| 7333: Electrical mechanics                                                             | 19                                      | 1                             | 5.3                | 100.0                                         | 0.0     | 0.0      | 0.76 (0.56-0.95)                                                               |                                    |
| 7371: Crane operators                                                                  | 77                                      | 3                             | 3.9                | 100.0                                         | 0.0     | 0.0      | 0.76 (0.56-0.95)                                                               |                                    |
| 7372: Drillers and blasters - surface mining, quarrying and construction               | 45                                      | 1                             | 2.2                | 100.0                                         | 0.0     | 0.0      | 0.76 (0.56-0.95)                                                               |                                    |
| 7381: Printing press operators                                                         | 106                                     | 2                             | 1.9                | 0.0                                           | 50.0    | 50.0     | 1.32 (1.08-1.65)                                                               |                                    |

| NOC 2011 occupation code and title                                                            | CANJEM cell estimates, period 1930-2005 |                   |                       |                                               |         |          | Predicted wood dust GM (90%CI) for year 1989 (mg/m <sup>3</sup> ) <sup>d</sup> |                                    |
|-----------------------------------------------------------------------------------------------|-----------------------------------------|-------------------|-----------------------|-----------------------------------------------|---------|----------|--------------------------------------------------------------------------------|------------------------------------|
|                                                                                               | N <sup>a</sup>                          | Nexp <sup>b</sup> | P <sup>c</sup><br>(%) | Relative percentage of exposed jobs by rating |         |          | Ratings only                                                                   | Combined ratings and random effect |
|                                                                                               |                                         |                   |                       | Low (%)                                       | Med (%) | High (%) |                                                                                |                                    |
| 7384: Other trades and related occupations, n.e.c.                                            | 13                                      | 4                 | 30.8                  | 50.0                                          | 50.0    | 0.0      | 0.86 (0.71-1.03)                                                               | 0.74 (0.45-1.22)                   |
| 7441: Residential and commercial installers and servicers                                     | 51                                      | 29                | 56.9                  | 24.1                                          | 27.6    | 48.3     | 1.23 (1.02-1.50)                                                               |                                    |
| 7445: Other repairers and servicers                                                           | 25                                      | 1                 | 4.0                   | 0.0                                           | 100.0   | 0.0      | 0.97 (0.77-1.27)                                                               |                                    |
| 7451: Longshore workers                                                                       | 87                                      | 14                | 16.1                  | 21.4                                          | 71.4    | 7.1      | 0.97 (0.80-1.17)                                                               |                                    |
| 7452: Material handlers                                                                       | 743                                     | 56                | 7.5                   | 66.1                                          | 28.6    | 5.4      | 0.85 (0.69-1.02)                                                               | 0.68 (0.55-0.84)                   |
| 7511: Transport truck drivers                                                                 | 784                                     | 54                | 6.9                   | 63.0                                          | 31.5    | 5.6      | 0.86 (0.71-1.03)                                                               |                                    |
| 7514: Delivery and courier service drivers                                                    | 499                                     | 12                | 2.4                   | 66.7                                          | 33.3    | 0.0      | 0.82 (0.66-1.00)                                                               |                                    |
| 7521: Heavy equipment operators (except crane)                                                | 119                                     | 3                 | 2.5                   | 33.3                                          | 66.7    | 0.0      | 0.90 (0.73-1.09)                                                               | 0.54 (0.36-0.81)                   |
| 7522: Public works maintenance equipment operators and related workers                        | 36                                      | 1                 | 2.8                   | 100.0                                         | 0.0     | 0.0      | 0.76 (0.56-0.95)                                                               |                                    |
| 7531: Railway yard and track maintenance workers                                              | 60                                      | 4                 | 6.7                   | 100.0                                         | 0.0     | 0.0      | 0.76 (0.56-0.95)                                                               |                                    |
| 7532: Water transport deck and engine room crew                                               | 114                                     | 3                 | 2.6                   | 33.3                                          | 66.7    | 0.0      | 0.90 (0.73-1.09)                                                               |                                    |
| 7611: Construction trades helpers and labourers                                               | 488                                     | 288               | 59.0                  | 50.0                                          | 48.6    | 1.4      | 0.87 (0.71-1.04)                                                               | 0.64 (0.50-0.83)                   |
| 7612: Other trades helpers and labourers                                                      | 31                                      | 2                 | 6.5                   | 0.0                                           | 100.0   | 0.0      | 0.97 (0.77-1.27)                                                               | 1.22 (0.75-2.03)                   |
| 7621: Public works and maintenance labourers                                                  | 53                                      | 7                 | 13.2                  | 28.6                                          | 71.4    | 0.0      | 0.91 (0.74-1.11)                                                               |                                    |
| 7622: Railway and motor transport labourers                                                   | 17                                      | 1                 | 5.9                   | 100.0                                         | 0.0     | 0.0      | 0.76 (0.56-0.95)                                                               |                                    |
| 8211: Supervisors, logging and forestry                                                       | 5                                       | 3                 | 60.0                  | 66.7                                          | 33.3    | 0.0      | 0.82 (0.66-1.00)                                                               |                                    |
| 8255: Contractors and supervisors, landscaping, grounds maintenance and horticulture services | 15                                      | 1                 | 6.7                   | 0.0                                           | 100.0   | 0.0      | 0.97 (0.77-1.27)                                                               |                                    |
| 8421: Chain saw and skidder operators                                                         | 272                                     | 259               | 95.2                  | 52.1                                          | 46.7    | 1.2      | 0.86 (0.71-1.03)                                                               | 1.96 (1.24-3.17)                   |
| 8422: Silviculture and forestry workers                                                       | 9                                       | 4                 | 44.4                  | 75.0                                          | 25.0    | 0.0      | 0.80 (0.64-0.99)                                                               |                                    |
| 8431: General farm workers                                                                    | 596                                     | 77                | 12.9                  | 53.2                                          | 42.9    | 3.9      | 0.87 (0.72-1.04)                                                               |                                    |
| 8432: Nursery and greenhouse workers                                                          | 13                                      | 1                 | 7.7                   | 0.0                                           | 100.0   | 0.0      | 0.97 (0.77-1.27)                                                               |                                    |
| 8612: Landscaping and grounds maintenance labourers                                           | 87                                      | 7                 | 8.0                   | 14.3                                          | 85.7    | 0.0      | 0.94 (0.76-1.18)                                                               |                                    |
| 8614: Mine labourers                                                                          | 65                                      | 4                 | 6.2                   | 25.0                                          | 75.0    | 0.0      | 0.92 (0.74-1.12)                                                               |                                    |

| NOC 2011 occupation code and title                                                        | CANJEM cell estimates, period 1930-2005 |                   |                       |                                               |         |          | Predicted wood dust GM (90%CI) for year 1989 (mg/m <sup>3</sup> ) <sup>d</sup> |                                    |
|-------------------------------------------------------------------------------------------|-----------------------------------------|-------------------|-----------------------|-----------------------------------------------|---------|----------|--------------------------------------------------------------------------------|------------------------------------|
|                                                                                           | N <sup>a</sup>                          | Nexp <sup>b</sup> | P <sup>c</sup><br>(%) | Relative percentage of exposed jobs by rating |         |          | Ratings only                                                                   | Combined ratings and random effect |
|                                                                                           |                                         |                   |                       | Low (%)                                       | Med (%) | High (%) |                                                                                |                                    |
| 8616: Logging and forestry labourers                                                      | 25                                      | 13                | 52.0                  | 84.6                                          | 15.4    | 0.0      | 0.78 (0.61-0.97)                                                               |                                    |
| 9212: Supervisors, petroleum, gas and chemical processing and utilities                   | 28                                      | 3                 | 10.7                  | 100.0                                         | 0.0     | 0.0      | 0.76 (0.56-0.95)                                                               |                                    |
| 9214: Supervisors, plastic and rubber products manufacturing                              | 15                                      | 2                 | 13.3                  | 50.0                                          | 50.0    | 0.0      | 0.86 (0.71-1.03)                                                               |                                    |
| 9215: Supervisors, forest products processing                                             | 9                                       | 5                 | 55.6                  | 80.0                                          | 0.0     | 20.0     | 0.90 (0.71-1.09)                                                               |                                    |
| 9217: Supervisors, textile, fabric, fur and leather products processing and manufacturing | 111                                     | 7                 | 6.3                   | 28.6                                          | 57.1    | 14.3     | 0.99 (0.84-1.17)                                                               |                                    |
| 9222: Supervisors, electronics manufacturing                                              | 12                                      | 1                 | 8.3                   | 100.0                                         | 0.0     | 0.0      | 0.76 (0.56-0.95)                                                               |                                    |
| 9224: Supervisors, furniture and fixtures manufacturing                                   | 24                                      | 21                | 87.5                  | 23.8                                          | 38.1    | 38.1     | 1.15 (0.98-1.38)                                                               | 1.48 (0.96-2.30)                   |
| 9227: Supervisors, other products manufacturing and assembly                              | 16                                      | 1                 | 6.3                   | 0.0                                           | 0.0     | 100.0    | 1.77 (1.23-2.73)                                                               | 1.58 (0.95-2.62)                   |
| 9241: Power engineers and power systems operators                                         | 107                                     | 5                 | 4.7                   | 40.0                                          | 40.0    | 20.0     | 0.99 (0.85-1.16)                                                               |                                    |
| 9411: Machine operators, mineral and metal processing                                     | 37                                      | 1                 | 2.7                   | 0.0                                           | 100.0   | 0.0      | 0.97 (0.77-1.27)                                                               |                                    |
| 9412: Foundry workers                                                                     | 79                                      | 2                 | 2.5                   | 100.0                                         | 0.0     | 0.0      | 0.76 (0.56-0.95)                                                               |                                    |
| 9414: Concrete, clay and stone forming operators                                          | 50                                      | 1                 | 2.0                   | 0.0                                           | 100.0   | 0.0      | 0.97 (0.77-1.27)                                                               |                                    |
| 9416: Metalworking and forging machine operators                                          | 149                                     | 2                 | 1.3                   | 0.0                                           | 100.0   | 0.0      | 0.97 (0.77-1.27)                                                               |                                    |
| 9417: Machining tool operators                                                            | 175                                     | 2                 | 1.1                   | 50.0                                          | 50.0    | 0.0      | 0.86 (0.71-1.03)                                                               |                                    |
| 9421: Chemical plant machine operators                                                    | 98                                      | 5                 | 5.1                   | 0.0                                           | 100.0   | 0.0      | 0.97 (0.77-1.27)                                                               |                                    |
| 9422: Plastics processing machine operators                                               | 26                                      | 2                 | 7.7                   | 0.0                                           | 50.0    | 50.0     | 1.32 (1.08-1.65)                                                               |                                    |
| 9431: Sawmill machine operators                                                           | 10                                      | 10                | 100.0                 | 10.0                                          | 10.0    | 80.0     | 1.53 (1.15-2.15)                                                               | 0.91 (0.83-0.99)                   |
| 9432: Pulp mill machine operators                                                         | 5                                       | 2                 | 40.0                  | 100.0                                         | 0.0     | 0.0      | 0.76 (0.56-0.95)                                                               |                                    |
| 9433: Papermaking and finishing machine operators                                         | 12                                      | 2                 | 16.7                  | 50.0                                          | 50.0    | 0.0      | 0.86 (0.71-1.03)                                                               |                                    |
| 9434: Other wood processing machine operators                                             | 13                                      | 8                 | 61.5                  | 37.5                                          | 50.0    | 12.5     | 0.96 (0.81-1.13)                                                               | 0.73 (0.66-0.82)                   |
| 9435: Paper converting machine operators                                                  | 68                                      | 3                 | 4.4                   | 100.0                                         | 0.0     | 0.0      | 0.76 (0.56-0.95)                                                               |                                    |
| 9436: Lumber graders and other wood processing inspectors and graders                     | 11                                      | 10                | 90.9                  | 60.0                                          | 20.0    | 20.0     | 0.94 (0.79-1.12)                                                               | 0.54 (0.43-0.66)                   |

| NOC 2011 occupation code and title                                                             | CANJEM cell estimates, period 1930-2005 |                               |                    |                                               |         |          | Predicted wood dust GM (90%CI) for year 1989 (mg/m <sup>3</sup> ) <sup>d</sup> |                                    |
|------------------------------------------------------------------------------------------------|-----------------------------------------|-------------------------------|--------------------|-----------------------------------------------|---------|----------|--------------------------------------------------------------------------------|------------------------------------|
|                                                                                                | N <sup>a</sup>                          | N <sub>exp</sub> <sup>b</sup> | P <sup>c</sup> (%) | Relative percentage of exposed jobs by rating |         |          | Ratings only                                                                   | Combined ratings and random effect |
|                                                                                                |                                         |                               |                    | Low (%)                                       | Med (%) | High (%) |                                                                                |                                    |
| 9437: Woodworking machine operators                                                            | 57                                      | 54                            | 94.7               | 5.6                                           | 24.1    | 70.4     | 1.47 (1.14-1.97)                                                               | 1.58 (1.47-1.70)                   |
| 9441: Textile fibre and yarn, hide and pelt processing machine operators and workers           | 143                                     | 12                            | 8.4                | 41.7                                          | 50.0    | 8.3      | 0.92 (0.78-1.09)                                                               |                                    |
| 9445: Fabric, fur and leather cutters                                                          | 117                                     | 3                             | 2.6                | 66.7                                          | 33.3    | 0.0      | 0.82 (0.66-1.00)                                                               |                                    |
| 9446: Industrial sewing machine operators                                                      | 680                                     | 1                             | 0.1                | 100.0                                         | 0.0     | 0.0      | 0.76 (0.56-0.95)                                                               |                                    |
| 9447: Inspectors and graders, textile, fabric, fur and leather products manufacturing          | 41                                      | 1                             | 2.4                | 100.0                                         | 0.0     | 0.0      | 0.76 (0.56-0.95)                                                               |                                    |
| 9461: Process control and machine operators, food, beverage and associated products processing | 173                                     | 4                             | 2.3                | 25.0                                          | 50.0    | 25.0     | 1.06 (0.91-1.25)                                                               |                                    |
| 9462: Industrial butchers and meat cutters, poultry preparers and related workers              | 100                                     | 21                            | 21.0               | 95.2                                          | 4.8     | 0.0      | 0.77 (0.58-0.96)                                                               |                                    |
| 9471: Plateless printing equipment operators                                                   | 20                                      | 1                             | 5.0                | 100.0                                         | 0.0     | 0.0      | 0.76 (0.56-0.95)                                                               |                                    |
| 9472: Camera, platemaking and other prepress occupations                                       | 26                                      | 1                             | 3.8                | 100.0                                         | 0.0     | 0.0      | 0.76 (0.56-0.95)                                                               |                                    |
| 9474: Photographic and film processors                                                         | 23                                      | 1                             | 4.3                | 0.0                                           | 0.0     | 100.0    | 1.77 (1.23-2.73)                                                               |                                    |
| 9523: Electronics assemblers, fabricators, inspectors and testers                              | 62                                      | 2                             | 3.2                | 50.0                                          | 50.0    | 0.0      | 0.86 (0.71-1.03)                                                               |                                    |
| 9524: Assemblers and inspectors, electrical appliance, apparatus and equipment manufacturing   | 60                                      | 2                             | 3.3                | 50.0                                          | 50.0    | 0.0      | 0.86 (0.71-1.03)                                                               |                                    |
| 9526: Mechanical assemblers and inspectors                                                     | 22                                      | 5                             | 22.7               | 40.0                                          | 60.0    | 0.0      | 0.88 (0.72-1.06)                                                               |                                    |
| 9532: Furniture and fixture assemblers and inspectors                                          | 45                                      | 34                            | 75.6               | 32.4                                          | 32.4    | 35.3     | 1.11 (0.94-1.31)                                                               | 1.47 (1.24-1.75)                   |
| 9533: Other wood products assemblers and inspectors                                            | 19                                      | 19                            | 100.0              | 5.3                                           | 42.1    | 52.6     | 1.32 (1.08-1.65)                                                               | 1.24 (1.04-1.48)                   |
| 9534: Furniture finishers and refinishers                                                      | 9                                       | 7                             | 77.8               | 14.3                                          | 57.1    | 28.6     | 1.12 (0.95-1.33)                                                               | 1.77 (1.31-2.40)                   |
| 9535: Plastic products assemblers, finishers and inspectors                                    | 16                                      | 1                             | 6.3                | 0.0                                           | 100.0   | 0.0      | 0.97 (0.77-1.27)                                                               |                                    |
| 9536: Industrial painters, coaters and metal finishing process operators                       | 107                                     | 8                             | 7.5                | 25.0                                          | 75.0    | 0.0      | 0.92 (0.74-1.12)                                                               | 0.84 (0.56-1.27)                   |
| 9537: Other products assemblers, finishers and inspectors                                      | 158                                     | 13                            | 8.2                | 53.8                                          | 30.8    | 15.4     | 0.93 (0.79-1.10)                                                               |                                    |

| NOC 2011 occupation code and title                                   | CANJEM cell estimates, period 1930-2005 |                               |                    |                                               |         |          | Predicted wood dust GM (90%CI) for year 1989 (mg/m <sup>3</sup> ) <sup>d</sup> |                                    |
|----------------------------------------------------------------------|-----------------------------------------|-------------------------------|--------------------|-----------------------------------------------|---------|----------|--------------------------------------------------------------------------------|------------------------------------|
|                                                                      | N <sup>a</sup>                          | N <sub>exp</sub> <sup>b</sup> | P <sup>c</sup> (%) | Relative percentage of exposed jobs by rating |         |          | Ratings only                                                                   | Combined ratings and random effect |
|                                                                      |                                         |                               |                    | Low (%)                                       | Med (%) | High (%) |                                                                                |                                    |
| 9611: Labourers in mineral and metal processing                      | 93                                      | 6                             | 6.5                | 50.0                                          | 50.0    | 0.0      | 0.86 (0.71-1.03)                                                               |                                    |
| 9612: Labourers in metal fabrication                                 | 162                                     | 6                             | 3.7                | 66.7                                          | 16.7    | 16.7     | 0.91 (0.75-1.08)                                                               | 1.02 (0.69-1.50)                   |
| 9614: Labourers in wood, pulp and paper processing                   | 63                                      | 54                            | 85.7               | 22.2                                          | 50.0    | 27.8     | 1.09 (0.93-1.29)                                                               | 0.75 (0.66-0.84)                   |
| 9615: Labourers in rubber and plastic products manufacturing         | 12                                      | 1                             | 8.3                | 0.0                                           | 100.0   | 0.0      | 0.97 (0.77-1.27)                                                               |                                    |
| 9617: Labourers in food, beverage and associated products processing | 122                                     | 2                             | 1.6                | 100.0                                         | 0.0     | 0.0      | 0.76 (0.56-0.95)                                                               |                                    |
| 9619: Other labourers in processing, manufacturing and utilities     | 425                                     | 26                            | 6.1                | 38.5                                          | 26.9    | 34.6     | 1.09 (0.92-1.29)                                                               | 1.61 (1.31-1.97)                   |

<sup>a</sup>Total number of jobs evaluated

<sup>b</sup>Number of jobs exposed to wood dust

<sup>c</sup>Probability of exposure to wood dust

<sup>d</sup>Predicted GM and 90% interval for the year 1989, a sampling duration of 480 minutes, personal sample type, relative proportion of measurements in each province, and the relative proportion of exposed jobs by intensity rating in the cell



## Supplementary File S1. JAGS program used to fit the main model

```
# JAGS program used for the main analysis
# Model defined by
# - Occupations (4-digit NOC codes) as random effects (n=31)
# - CANJEM rating as proportion of jobs
#   at medium and proportion of jobs at high
#   with constraint on low/medium/high
# - Other predictors:
#   1) sample year, 2) sample duration,
#   3) personal sample type, 4) Province = Ontario

model{

# A) Priors

# 1) Intercept
alpha ~ dnorm(0, 0.0001)
# 2) Coefficients for fixed effects except intensity (nbeta=5)
for(i in 1:nbeta) {beta[i] ~ dnorm(0, 0.1756)}

# 3) Coefficients for intensity levels with constraint
# Folded normal distributions
for(i in 1:2){beta.C0[i] ~ dnorm(0, 0.02145)T(0,)}
# Sort to put constraint low < medium < high
beta.C[1:2] <- sort(beta.C0)

# 4) Occupation means
for(i in 1:n.noc){
mu.noc[i] ~ dnorm(0, tau.noc)
}

# 5) Residual SD
tau <- pow(sigma, -2)
sigma ~ dunif(0, 10)

# 6) Between-occupation SD
sigma.noc ~ dunif(0, 10)
tau.noc <- pow(sigma.noc, -2)

# B) Likelihood
for(i in 1:n){
# For measurements under LOD
isAboveLOD[i] ~ dinterval(logconc[i], loglod[i])
}
```

```

    # Likelihood
    logconc[i] ~ dnorm(mu[i], tau)
    mu[i] <- alpha + mu.noc[vec.noc[i]] + inprod(beta, modmat[i,]) +
inprod(beta.C, modmat.C[i,])
  }
# Where
# modmat = design matrix for predictors except occupation and CANJEM rating
# modmat.C = design matrix for CANJEM ratings
# (proportion of jobs at medium and proportion at high)
# vec.noc = index of occupations

# C) Predictions
# 1) For 100% of jobs by intensity rating, duration of 480 minutes
for(i in 1:3){
  pred.C480[i] <- exp(alpha + inprod(beta, Cpredmat480[i,]) + inprod(beta.C,
Cpredmat.C[i,]))
}
# Where Cpredmat = prediction matrix (except occupation and CANJEM rating)
# Cpredmat.C = prediction matrix for CANJEM rating

# 2) For occupations, duration of 480 minutes
for(i in 1:n.noc){
  pred.noc480[i] <- exp(alpha + mu.noc[predmat.noc[i]] + inprod(beta,
predmat480[i,]) + inprod(beta.C, predmat.C[i,]))
}
# Where
# n.noc = 31 occupations
# predmat = prediction matrix (except occupation and CANJEM rating)
# predmat.C = prediction matrix for CANJEM rating
# (proportion of jobs at medium and high levels in cell)
# predmat.noc = index of occupation code

# 3) For all cells with P>0% in CANJEM, based on
# proportions of jobs at low, medium and high
# n.nocAll = 198 occupations
# predmatAll480 = prediction matrix (excluding CANJEM ratings)
# predmatAll.C = prediction matrix for CANJEM rating of occupations
for(i in 1:n.nocAll){
  pred.nocAll480[i] <- exp(alpha + inprod(beta, predmatAll480[i,]) +
inprod(beta.C, predmatAll.C[i,]))
}
}

```
